# Supplementary material for: Growth Curve Models and Clustering Techniques for the Study of New Sugarcane Hybrids: An Integrated Approach with K-Means, K-Medoids, and DBSCAN
Source: Preprints.org preprint supplement (doi:10.20944/preprints202409.0179.v1), 2024-09-03
Supplement: Supplementary file 1 [file supplementary]

## Sheet: Las Pilas year1
NO.	Hibridos	Sacarosa1	Sacarosa2	Sacarosa3	Sacarosa4
1	COSTA JAL	7.33	12.32	11.47	12.26
2	RB 85-5035	8.5	10.19	11.15	11.39
3	ITV 92-1424	10.26	10.17	13.14	13.67
4	RB 85-5113	9.05	12.91	11.1	13.67
5	LAICA 92-13	9.32	10.19	7.85	12.01
6	CP 72-2086	9	12.16	10.78	13.85
7	COLMEX 94-8	10.36	11.32	14.29	15.61
8	ATEMEX 99-48	10.87	13.25	13.7	13.66
9	ATEMEX 99-1	10.77	9.19	10.8	9.83
10	ATEMEX 99-61	11.4	11.43	13.14	12.43
11	MEX 70-486	9.09	11.02	13.39	14.01
12	TCP 89-3505	5.24	6.47	10.46	8.98
13	MEX 80-1521	9.8	9.87	11.49	11.74
14	MEX 69-290	5.03	11.74	13.16	13.45
15	ITSAMEX 07-44814	9.12	12.09	9.58	9.21
16	ITSAMEX 06-3049	6.01	10.51	11	12.57
17	ITSAMEX 07-8681	7.83	7.59	11.83	12.69
18	ITSAMEX 07-20810	5.58	7.91	8.68	7.51
19	ITSAMEX 07-7501	4.19	6.25	9.98	13.15

## Sheet: Las Pilas year2
NO.	Hibridos	Sacarosa1	Sacarosa2	Sacarosa3	Sacarosa4
1	COSTA JAL	8.14	10.89	13.74	14.47
2	RB 85-5035	7.16	10.6	10.21	15.58
3	ITV 92-1424	9.96	12.27	15.04	16.22
4	RB 85-5113	10.69	13.17	13.64	15.98
5	LAICA 92-13	8.31	9.83	11.45	13
6	CP 72-2086	11.26	14.4	15.77	17.09
7	COLMEX 94-8	12.45	13.73	14.69	16.91
8	ATEMEX 99-48	12.6	13.59	15.93	15.67
9	ATEMEX 99-1	8.81	11.33	13.42	15.6
10	ATEMEX 99-61	11.22	12.05	14.38	15.47
11	MEX 70-486	10.89	13.74	15.59	15.81
12	TCP 89-3505	6.96	10.31	13.48	12.59
13	MEX 80-1521	9.12	12.06	13.04	14.77
14	MEX 69-290	8.73	12.19	12.24	14.84
15	ITSAMEX 07-44814	8.88	12.12	14.11	14.25
16	ITSAMEX 06-3049	8.67	9.66	12.7	14.78
17	ITSAMEX 07-8681	7.13	10.56	12.98	14.22
18	ITSAMEX 07-20810	7.8	9.42	13.57	14.19
19	ITSAMEX 07-7501	8.59	10.99	12.37	15.27
